# Supplementary material for: The roles of contact residue disorder and domain composition in characterizing protein–ligand binding specificity and promiscuity
Source: Royal Society of Chemistry journal article supplement (doi:10.1039/c1mb05325f), 2011-10-14
Supplement: c1mb05325f.pdf [file c1mb05325f.pdf]

## Supplementary information:

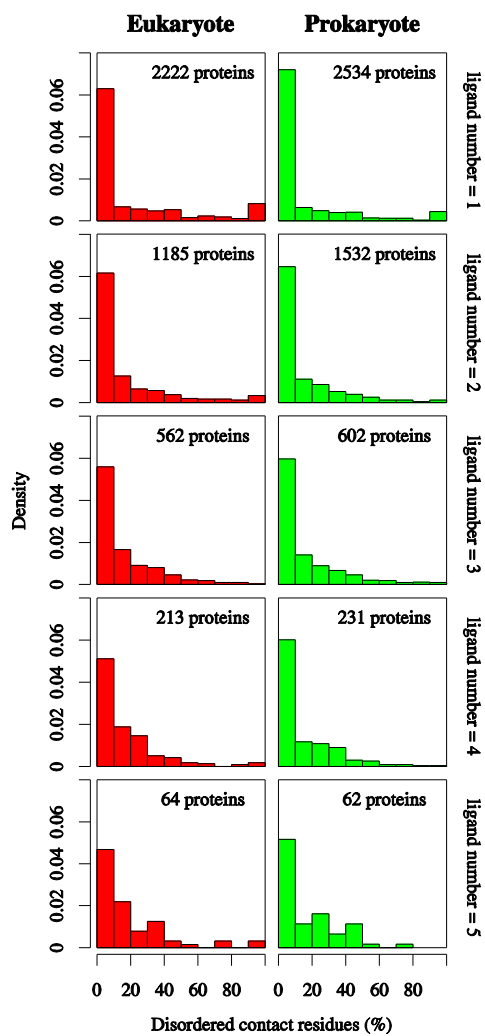

**Figure S1.** Distribution of disordered contact residues of proteins with 1, 2, 3, 4 and 5 bound ligands in eukaryotes and prokaryotes.

**Figure S2.** Association of contact residue disorder with GO annotations in ordered single domain proteins and ordered multiple domain proteins. Legend “Single” is ordered single domain proteins and legend “Mutiple” is orderd multiple domain proteins. (A) Eukaryote proteins with one ligand. (B) Prokaryote proteins with one ligand. (C) Eukaryote proteins with more ligands. (D) Prokaryote proteins with more ligands.

**Figure S2A.** Eukaryote proteins with one ligand.

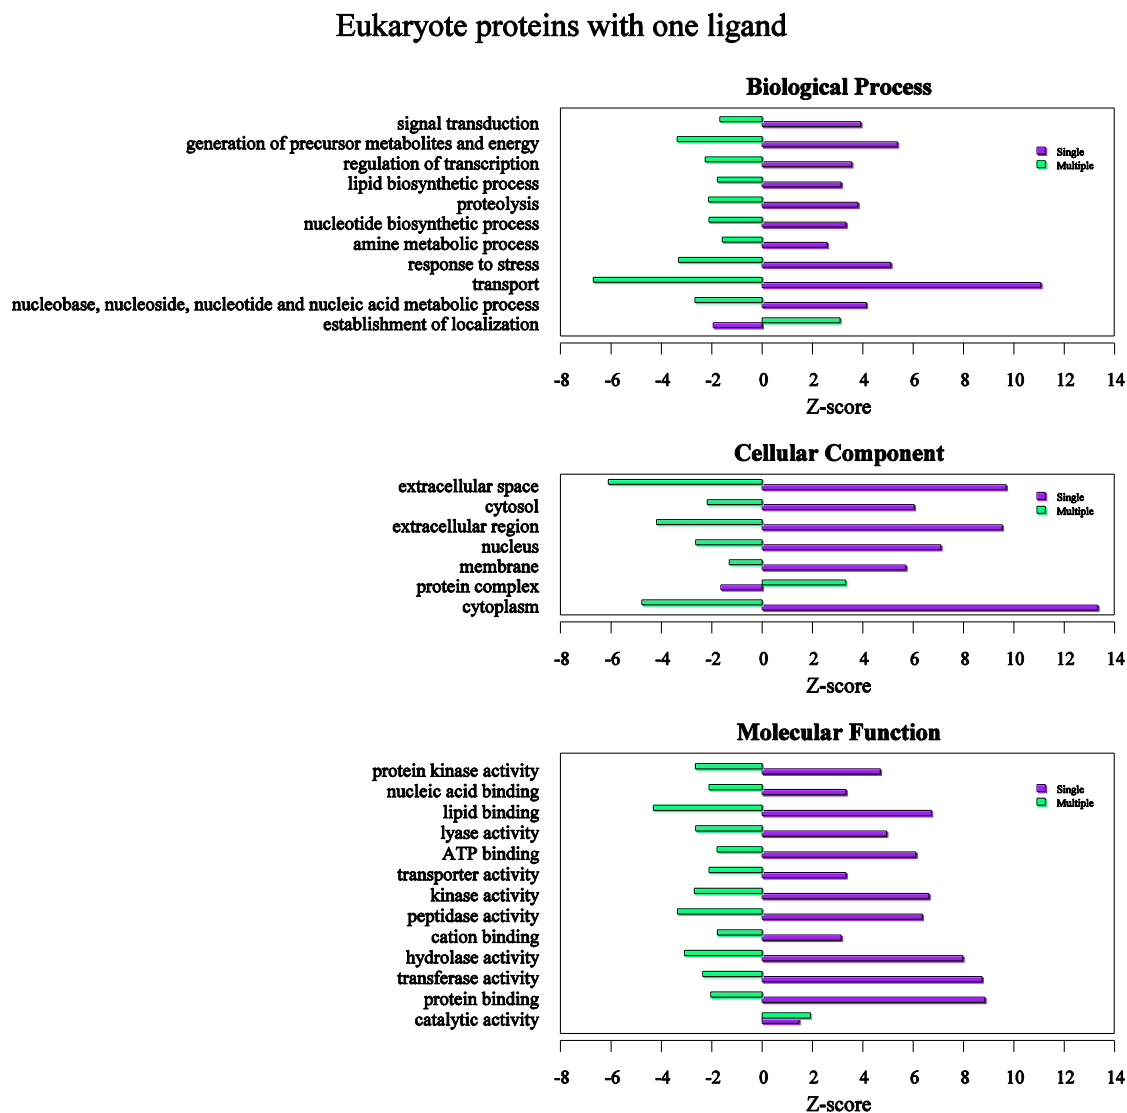

Figure S2B. Prokaryote proteins with one ligand.

### Prokaryote proteins with one ligand

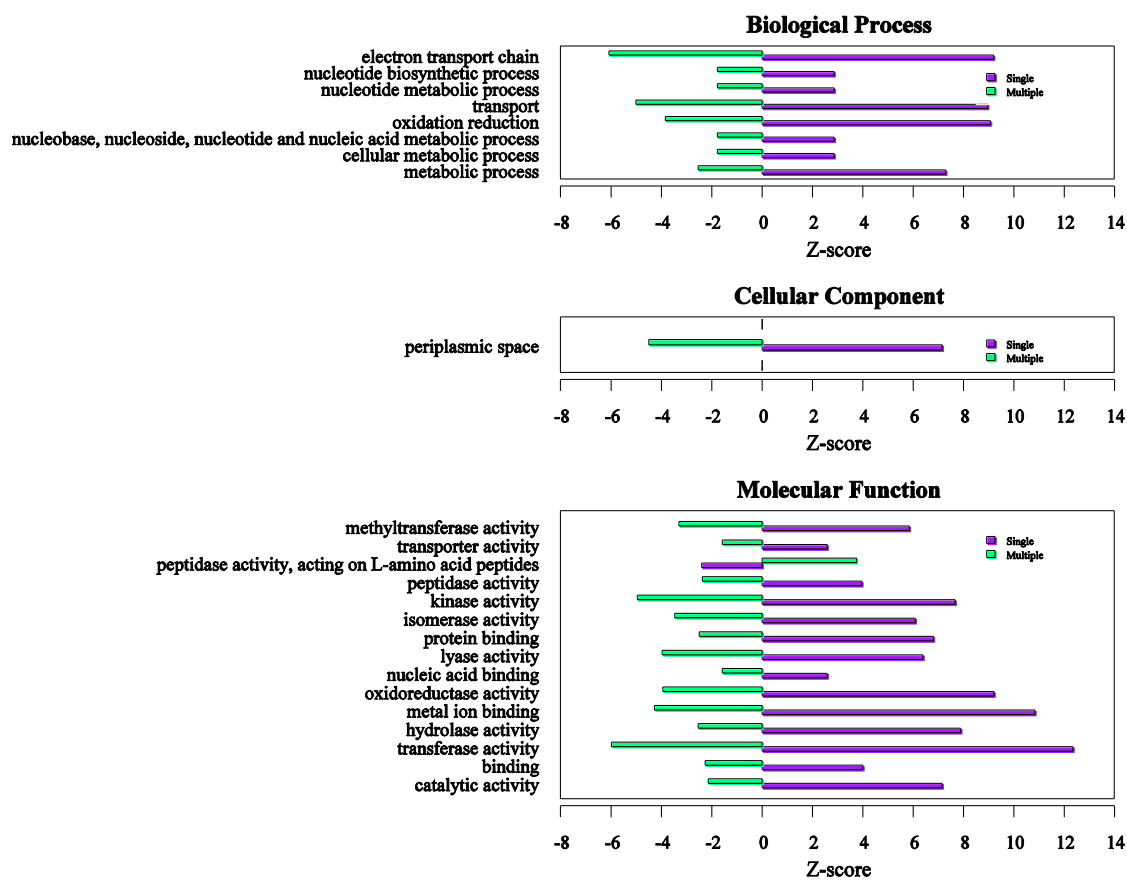

Figure S2C. Eukaryote proteins with more ligands.

### Eukaryote proteins with more ligands

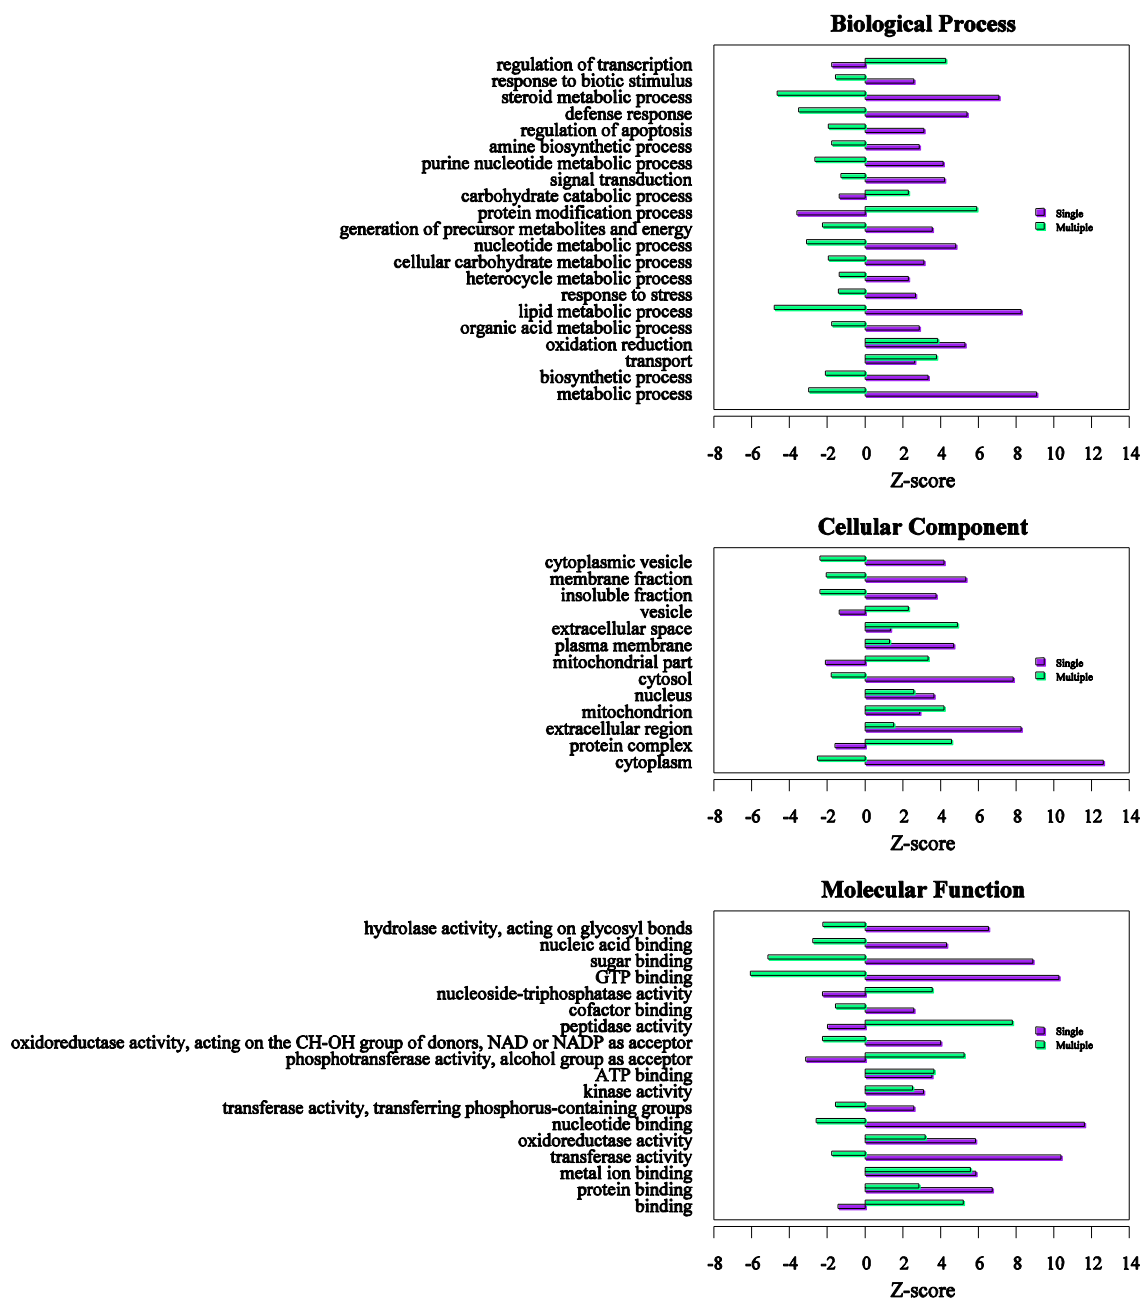

Figure S2D. Prokaryote proteins with more ligands.

### Prokaryote proteins with more ligands

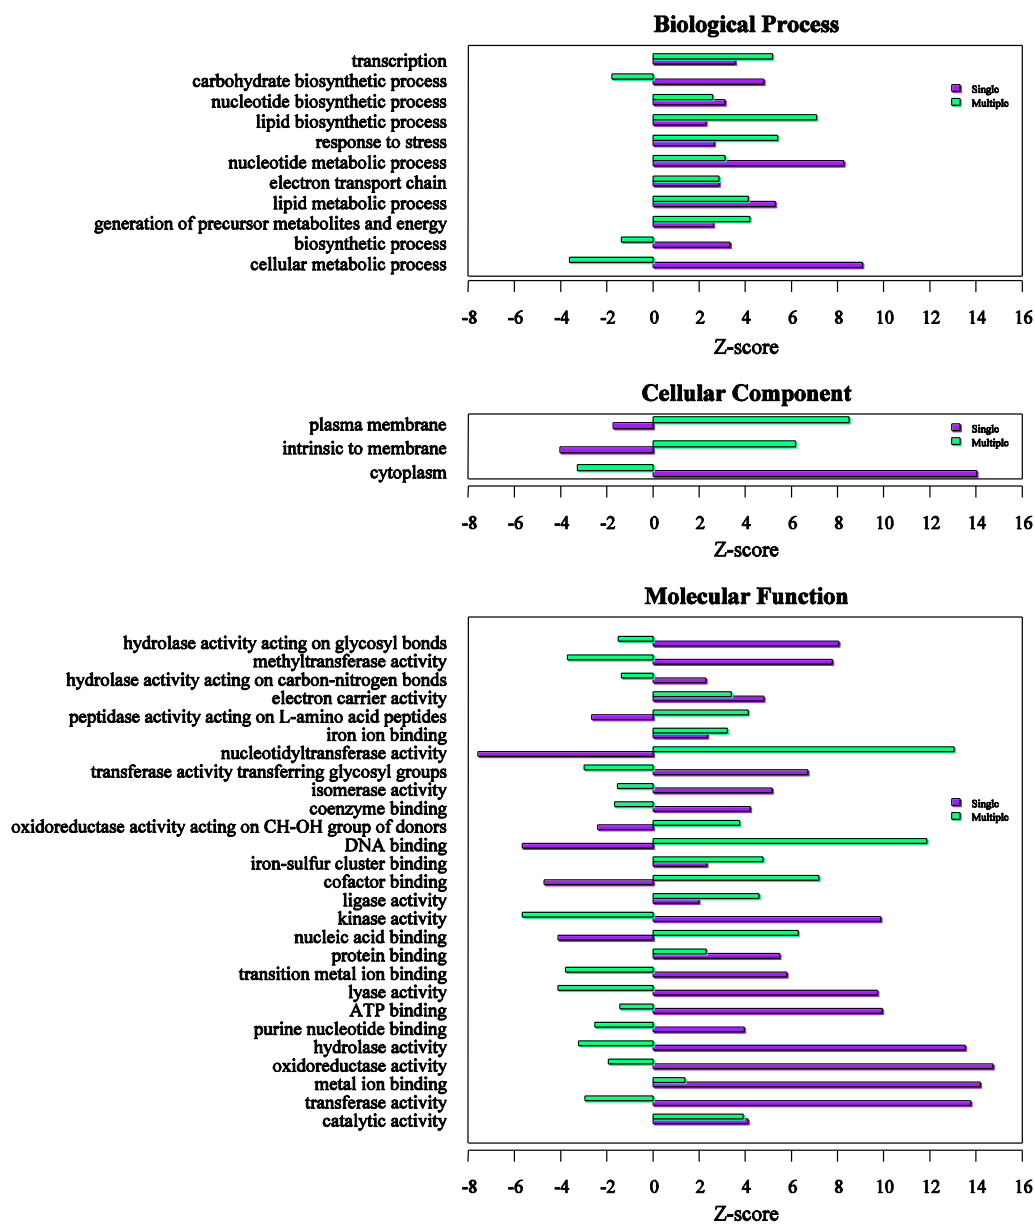

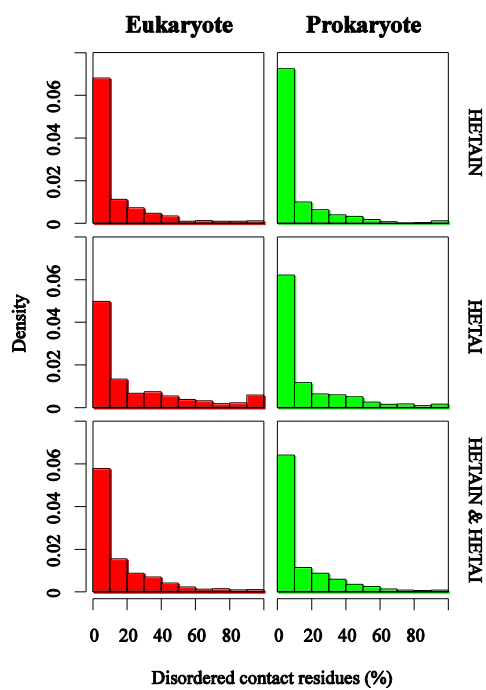

**FigureS3.** Distribution of disordered contact residues of proteins binding HETAIN, HETAI and HETAIN&HETAI in eukaryotes and prokaryotes.

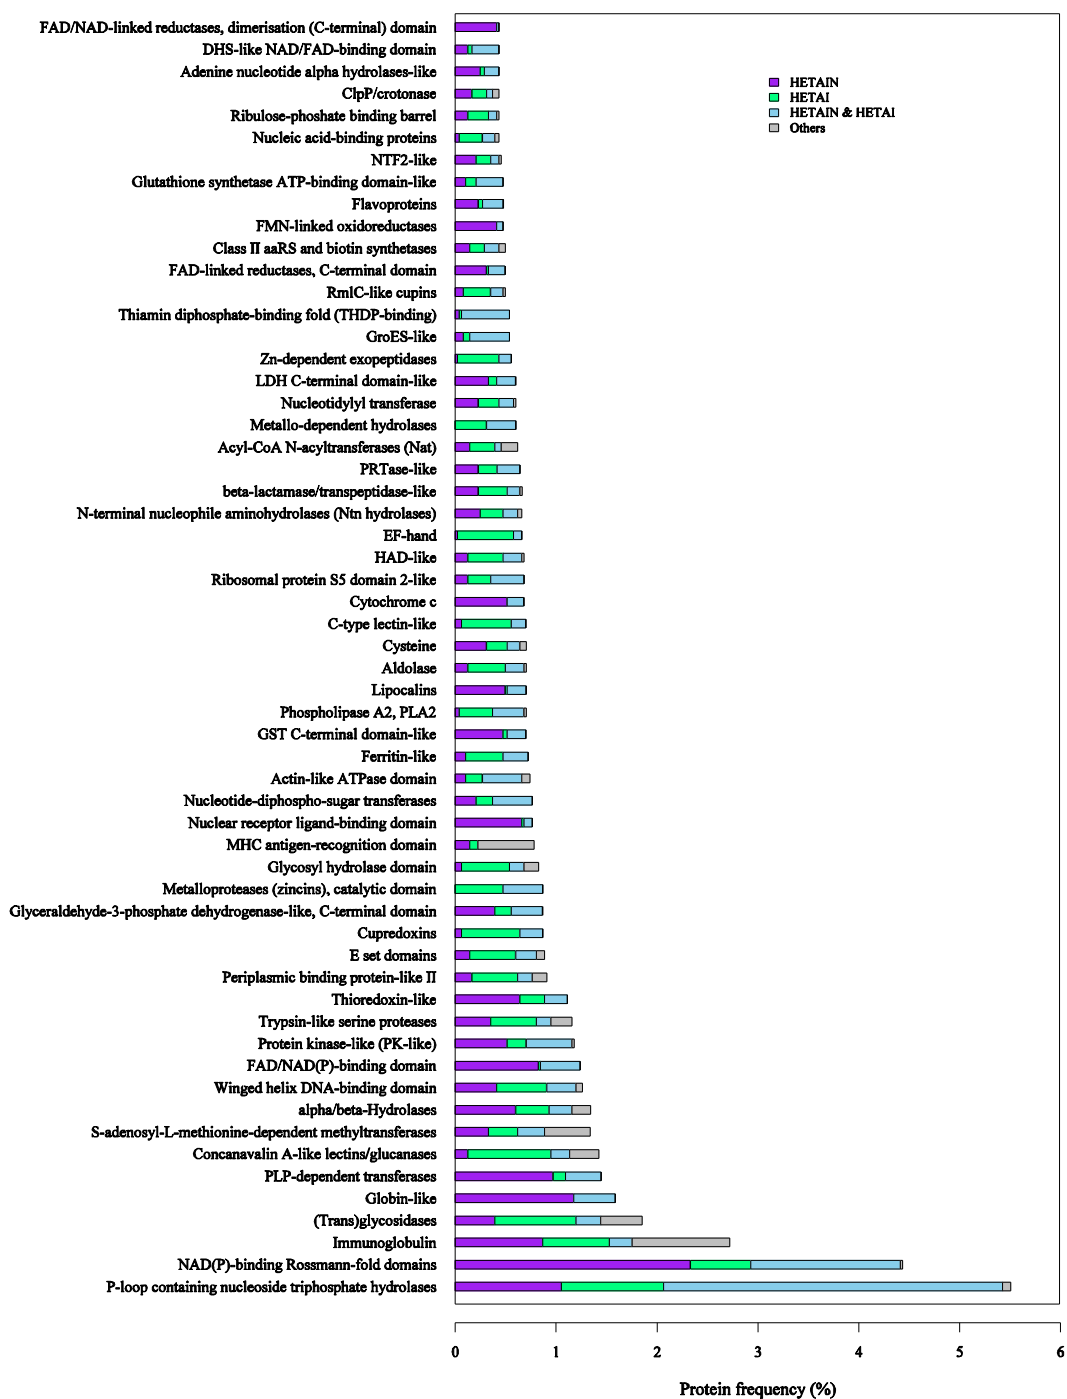

Figure S4. The top 58 superfamily domains with more than 20 proteins.

**Table S1A.** GO annotations from eukaryotic proteins with one ligand that are significantly over- or under-represented in disordered contact residues ( $P$ -value < 0.2).  $S\_zscore$  and  $M\_zscore$  are Z-score values on ordered single domain and ordered multiple domain.  $S\_pvalue$  and  $M\_pvalue$  are  $P$ -values on ordered single domain and ordered multiple domains.

| GO      | Name                                                                  | Namespace          | $S\_zscore$ | $M\_zscore$ | $S\_pvalue$ | $M\_pvalue$ |
|---------|-----------------------------------------------------------------------|--------------------|-------------|-------------|-------------|-------------|
| 0051234 | establishment of localization                                         | biological process | -1.949      | 3.103       | 5.135e-02   | 1.914e-03   |
| 0006139 | nucleobase, nucleoside, nucleotide and nucleic acid metabolic process | biological process | 4.133       | -2.661      | 3.584e-05   | 7.794e-03   |
| 0006810 | transport                                                             | biological process | 11.069      | -6.710      | 1.768e-28   | 1.941e-11   |
| 0006950 | response to stress                                                    | biological process | 5.104       | -3.325      | 3.319e-07   | 8.846e-04   |
| 0009308 | amine metabolic process                                               | biological process | 2.583       | -1.583      | 9.785e-03   | 1.133e-01   |
| 0009165 | nucleotide biosynthetic process                                       | biological process | 3.334       | -2.109      | 8.560e-04   | 3.492e-02   |
| 0006508 | proteolysis                                                           | biological process | 3.812       | -2.129      | 1.378e-04   | 3.327e-02   |
| 0008610 | lipid biosynthetic process                                            | biological process | 3.139       | -1.785      | 1.696e-03   | 7.429e-02   |
| 0045449 | regulation of transcription                                           | biological process | 3.550       | -2.259      | 3.849e-04   | 2.387e-02   |
| 0006091 | generation of precursor metabolites and energy                        | biological process | 5.375       | -3.375      | 7.658e-08   | 7.382e-04   |
| 0007165 | signal transduction                                                   | biological process | 3.913       | -1.677      | 9.111e-05   | 9.353e-02   |
| 0005737 | cytoplasm                                                             | cellular component | 13.337      | -4.783      | 1.406e-40   | 1.723e-06   |
| 0043234 | protein complex                                                       | cellular component | -1.634      | 3.317       | 1.023e-01   | 9.099e-04   |
| 0016020 | membrane                                                              | cellular component | 5.705       | -1.308      | 1.166e-08   | 1.910e-01   |
| 0005634 | nucleus                                                               | cellular component | 7.092       | -2.638      | 1.323e-12   | 8.330e-03   |
| 0005576 | extracellular region                                                  | cellular component | 9.538       | -4.199      | 1.462e-21   | 2.681e-05   |
| 0005829 | cytosol                                                               | cellular component | 6.037       | -2.185      | 1.572e-09   | 2.886e-02   |
| 0005615 | extracellular space                                                   | cellular component | 9.700       | -6.118      | 3.006e-22   | 9.480e-10   |
| 0003824 | catalytic activity                                                    | molecular function | 1.456       | 1.918       | 1.454e-01   | 5.507e-02   |
| 0005515 | protein binding                                                       | molecular function | 8.851       | -2.045      | 8.645e-19   | 4.090e-02   |
| 0016740 | transferase activity                                                  | molecular function | 8.742       | -2.365      | 2.284e-18   | 1.802e-02   |
| 0016787 | hydrolase activity                                                    | molecular function | 7.978       | -3.079      | 1.489e-15   | 2.078e-03   |
| 0043169 | cation binding                                                        | molecular function | 3.139       | -1.785      | 1.696e-03   | 7.429e-02   |
| 0008233 | peptidase activity                                                    | molecular function | 6.361       | -3.361      | 2.003e-10   | 7.763e-04   |
| 0016301 | kinase activity                                                       | molecular function | 6.625       | -2.688      | 3.468e-11   | 7.184e-03   |
| 0005215 | transporter activity                                                  | molecular function | 3.334       | -2.109      | 8.560e-04   | 3.492e-02   |
| 0005524 | ATP binding                                                           | molecular function | 6.114       | -1.794      | 9.700e-10   | 7.285e-02   |
| 0016829 | lyase activity                                                        | molecular function | 4.944       | -2.634      | 7.671e-07   | 8.435e-03   |
| 0008289 | lipid binding                                                         | molecular function | 6.728       | -4.313      | 1.718e-11   | 1.611e-05   |
| 0003676 | nucleic acid binding                                                  | molecular function | 3.334       | -2.109      | 8.560e-04   | 3.492e-02   |
| 0004672 | protein kinase activity                                               | molecular function | 4.695       | -2.654      | 2.668e-06   | 7.963e-03   |



**Table S1B.** GO annotations from prokaryotic proteins with one ligand that are significantly over- or under-represented in disordered contact residues ( $P$ -value  $< 0.2$ ).  $S\_zscore$  and  $M\_zscore$  are Z-score values on ordered single domain and ordered multiple domain.  $S\_pvalue$  and  $M\_pvalue$  are  $P$ -values on ordered single domain and ordered multiple domains.

| GO      | Name                                                                  | Namespace          | $S\_zscore$ | $M\_zscore$ | $S\_pvalue$ | $M\_pvalue$ |
|---------|-----------------------------------------------------------------------|--------------------|-------------|-------------|-------------|-------------|
| 0008152 | metabolic process                                                     | biological process | 7.291       | -2.547      | 3.08e-13    | 1.09e-02    |
| 0044237 | cellular metabolic process                                            | biological process | 2.855       | -1.774      | 4.31e-03    | 7.60e-02    |
| 0006139 | nucleobase, nucleoside, nucleotide and nucleic acid metabolic process | biological process | 2.855       | -1.774      | 4.31e-03    | 7.60e-02    |
| 0055114 | oxidation reduction                                                   | biological process | 9.07        | -3.841      | 1.20e-19    | 1.22e-04    |
| 0006810 | transport                                                             | biological process | 8.954       | -5.017      | 3.44e-19    | 5.26e-07    |
| 0009117 | nucleotide metabolic process                                          | biological process | 2.855       | -1.774      | 4.31e-03    | 7.60e-02    |
| 0009165 | nucleotide biosynthetic process                                       | biological process | 2.855       | -1.774      | 4.31e-03    | 7.60e-02    |
| 0022900 | electron transport chain                                              | biological process | 9.193       | -6.084      | 3.81e-20    | 1.17e-09    |
| 0042597 | periplasmic space                                                     | cellular component | 7.15        | -4.504      | 8.69e-13    | 6.67e-06    |
| 0003824 | catalytic activity                                                    | molecular function | 7.16        | -2.143      | 8.10e-13    | 3.21e-02    |
| 0005488 | binding                                                               | molecular function | 3.993       | -2.261      | 6.52e-05    | 2.37e-02    |
| 0016740 | transferase activity                                                  | molecular function | 12.348      | -5.984      | 4.98e-35    | 2.17e-09    |
| 0016787 | hydrolase activity                                                    | molecular function | 7.891       | -2.537      | 3.00e-15    | 1.12e-02    |
| 0046872 | metal ion binding                                                     | molecular function | 10.84       | -4.283      | 2.22e-27    | 1.85e-05    |
| 0016491 | oxidoreductase activity                                               | molecular function | 9.205       | -3.945      | 3.42e-20    | 7.98e-05    |
| 0003676 | nucleic acid binding                                                  | molecular function | 2.583       | -1.583      | 9.79e-03    | 1.13e-01    |
| 0016829 | lyase activity                                                        | molecular function | 6.383       | -3.968      | 1.74e-10    | 7.25e-05    |
| 0005515 | protein binding                                                       | molecular function | 6.8         | -2.499      | 1.04e-11    | 1.24e-02    |
| 0016853 | isomerase activity                                                    | molecular function | 6.089       | -3.475      | 1.14e-09    | 5.11e-04    |
| 0016301 | kinase activity                                                       | molecular function | 7.662       | -4.954      | 1.82e-14    | 7.25e-07    |
| 0008233 | peptidase activity                                                    | molecular function | 3.953       | -2.372      | 7.72e-05    | 1.77e-02    |
| 0070011 | peptidase activity, acting on L-amino acids                           | molecular function | -2.4        | 3.754       | 1.64e-02    | 1.74e-04    |
| 0005215 | transporter activity                                                  | molecular function | 2.583       | -1.583      | 9.79e-03    | 1.13e-01    |
| 0008168 | methyltransferase activity                                            | molecular function | 5.851       | -3.301      | 4.89e-09    | 9.62e-04    |

**Table S1C.** GO annotations from eukaryotic proteins with more ligands that are significantly over- or under-represented in disordered contact residues ( $P$ -value  $< 0.2$ ).  $S\_zscore$  and  $M\_zscore$  are  $Z$ -score values on ordered single domain and ordered multiple domain.  $S\_pvalue$  and  $M\_pvalue$  are  $P$ -values on ordered single domain and ordered multiple domains.

| GO      | Name                                                            | Namespace          | $S\_zscore$ | $M\_zscore$ | $S\_pvalue$ | $M\_pvalue$ |
|---------|-----------------------------------------------------------------|--------------------|-------------|-------------|-------------|-------------|
| 0008152 | metabolic process                                               | biological process | 9.076       | -3.007      | 1.13e-19    | 2.64e-03    |
| 0009058 | biosynthetic process                                            | biological process | 3.334       | -2.109      | 8.56e-04    | 3.49e-02    |
| 0006810 | transport                                                       | biological process | 2.62        | 3.771       | 8.78e-03    | 1.63e-04    |
| 0055114 | oxidation reduction                                             | biological process | 5.288       | 3.841       | 1.24e-07    | 1.22e-04    |
| 0006082 | organic acid metabolic process                                  | biological process | 2.855       | -1.774      | 4.31e-03    | 7.60e-02    |
| 0006629 | lipid metabolic process                                         | biological process | 8.261       | -4.821      | 1.45e-16    | 1.43e-06    |
| 0006950 | response to stress                                              | biological process | 2.654       | -1.429      | 7.96e-03    | 1.53e-01    |
| 0046483 | heterocycle metabolic process                                   | biological process | 2.282       | -1.369      | 2.25e-02    | 1.71e-01    |
| 0044262 | cellular carbohydrate metabolic process                         | biological process | 3.103       | -1.949      | 1.91e-03    | 5.14e-02    |
| 0009117 | nucleotide metabolic process                                    | biological process | 4.802       | -3.119      | 1.57e-06    | 1.82e-03    |
| 0006091 | generation of precursor metabolites and energy                  | biological process | 3.55        | -2.259      | 3.85e-04    | 2.39e-02    |
| 0006464 | protein modification process                                    | biological process | -3.63       | 5.903       | 2.84e-04    | 3.58e-09    |
| 0016052 | carbohydrate catabolic process                                  | biological process | -1.369      | 2.282       | 1.71e-01    | 2.25e-02    |
| 0007165 | signal transduction                                             | biological process | 4.186       | -1.299      | 2.84e-05    | 1.94e-01    |
| 0006163 | purine nucleotide metabolic process                             | biological process | 4.133       | -2.661      | 3.58e-05    | 7.79e-03    |
| 0009309 | amine biosynthetic process                                      | biological process | 2.855       | -1.774      | 4.31e-03    | 7.60e-02    |
| 0042981 | regulation of apoptosis                                         | biological process | 3.103       | -1.949      | 1.91e-03    | 5.14e-02    |
| 0006952 | defense response                                                | biological process | 5.39        | -3.519      | 7.06e-08    | 4.33e-04    |
| 0008202 | steroid metabolic process                                       | biological process | 7.073       | -4.658      | 1.51e-12    | 3.19e-06    |
| 0009607 | response to biotic stimulus                                     | biological process | 2.583       | -1.583      | 9.79e-03    | 1.13e-01    |
| 0045449 | regulation of transcription                                     | biological process | -1.779      | 4.262       | 7.53e-02    | 2.03e-05    |
| 0005737 | cytoplasm                                                       | cellular component | 12.608      | -2.541      | 1.91e-36    | 1.10e-02    |
| 0043234 | protein complex                                                 | cellular component | -1.598      | 4.57        | 1.10e-01    | 4.87e-06    |
| 0005576 | extracellular region                                            | cellular component | 8.269       | 1.512       | 1.35e-16    | 1.31e-01    |
| 0005739 | mitochondrion                                                   | cellular component | 2.891       | 4.169       | 3.84e-03    | 3.06e-05    |
| 0005634 | nucleus                                                         | cellular component | 3.635       | 2.585       | 2.78e-04    | 9.74e-03    |
| 0005829 | cytosol                                                         | cellular component | 7.848       | -1.807      | 4.21e-15    | 7.08e-02    |
| 0044429 | mitochondrial part                                              | cellular component | -2.109      | 3.334       | 3.49e-02    | 8.56e-04    |
| 0005886 | plasma membrane                                                 | cellular component | 4.695       | 1.293       | 2.67e-06    | 1.96e-01    |
| 0005615 | extracellular space                                             | cellular component | 1.328       | 4.878       | 1.84e-01    | 1.07e-06    |
| 0031982 | vesicle                                                         | cellular component | -1.369      | 2.282       | 1.71e-01    | 2.25e-02    |
| 0005626 | insoluble fraction                                              | cellular component | 3.754       | -2.4        | 1.74e-04    | 1.64e-02    |
| 0005624 | membrane fraction                                               | cellular component | 5.333       | -2.067      | 9.67e-08    | 3.88e-02    |
| 0031410 | cytoplasmic vesicle                                             | cellular component | 4.168       | -2.388      | 3.08e-05    | 1.69e-02    |
| 0005488 | binding                                                         | molecular function | -1.439      | 5.203       | 1.50e-01    | 1.96e-07    |
| 0005515 | protein binding                                                 | molecular function | 6.726       | 2.84        | 1.75e-11    | 4.51e-03    |
| 0046872 | metal ion binding                                               | molecular function | 5.853       | 5.563       | 4.82e-09    | 2.65e-08    |
| 0016740 | transferase activity                                            | molecular function | 10.36       | -1.777      | 3.78e-25    | 7.56e-02    |
| 0016491 | oxidoreductase activity                                         | molecular function | 5.833       | 3.177       | 5.46e-09    | 1.49e-03    |
| 0000166 | nucleotide binding                                              | molecular function | 11.622      | -2.594      | 3.20e-31    | 9.49e-03    |
| 0016772 | transferase activity, transferring phosphorus-containing groups | molecular function | 2.583       | -1.583      | 9.79e-03    | 1.13e-01    |

|         |                                                                                       |                    |        |        |          |          |
|---------|---------------------------------------------------------------------------------------|--------------------|--------|--------|----------|----------|
| 0016301 | kinase activity                                                                       | molecular function | 3.09   | 2.51   | 2.00e-03 | 1.21e-02 |
| 0005524 | ATP binding                                                                           | molecular function | 3.531  | 3.646  | 4.13e-04 | 2.67e-04 |
| 0016773 | phosphotransferase activity, alcohol group as acceptor                                | molecular function | -3.163 | 5.244  | 1.56e-03 | 1.57e-07 |
| 0016616 | oxidoreductase activity, acting on the CH-OH group of donors, NAD or NADP as acceptor | molecular function | 3.993  | -2.261 | 6.52e-05 | 2.37e-02 |
| 0008233 | peptidase activity                                                                    | molecular function | -2.001 | 7.789  | 4.54e-02 | 6.74e-15 |
| 0048037 | cofactor binding                                                                      | molecular function | 2.583  | -1.583 | 9.79e-03 | 1.13e-01 |
| 0017111 | nucleoside-triphosphatase activity                                                    | molecular function | -2.259 | 3.55   | 2.39e-02 | 3.85e-04 |
| 0005525 | GTP binding                                                                           | molecular function | 10.259 | -6.076 | 1.08e-24 | 1.23e-09 |
| 0005529 | sugar binding                                                                         | molecular function | 8.886  | -5.145 | 6.31e-19 | 2.68e-07 |
| 0003676 | nucleic acid binding                                                                  | molecular function | 4.31   | -2.782 | 1.63e-05 | 5.40e-03 |
| 0016798 | hydrolase activity, acting on glycosyl bonds                                          | molecular function | 6.52   | -2.238 | 7.03e-11 | 2.52e-02 |

---

**Table S1D.** GO annotations from prokaryotic proteins with more ligand that are significantly over- or under-represented in disordered contact residues ( $P$ -value  $< 0.2$ ).  $S\_zscore$  and  $M\_zscore$  are  $Z$ -score values on ordered single domain and ordered multiple domain.  $S\_pvalue$  and  $M\_pvalue$  are  $P$ -values on ordered single domain and ordered multiple domains.

| GO      | Name                                                                  | Namespace          | $S\_zscore$ | $M\_zscore$ | $S\_pvalue$ | $M\_pvalue$ |
|---------|-----------------------------------------------------------------------|--------------------|-------------|-------------|-------------|-------------|
| 0044237 | cellular metabolic process                                            | biological process | 5.169       | -2.896      | 2.350e-07   | 3.776e-03   |
| 0009058 | biosynthetic process                                                  | biological process | 6.276       | -3.447      | 3.483e-10   | 5.665e-04   |
| 0006091 | generation of precursor metabolites and energy                        | biological process | 2.583       | -1.583      | 9.785e-03   | 1.133e-01   |
| 0006629 | lipid metabolic process                                               | biological process | -1.429      | 2.654       | 1.530e-01   | 7.963e-03   |
| 0022900 | electron transport chain                                              | biological process | 9.739       | -1.533      | 2.052e-22   | 1.252e-01   |
| 0009117 | nucleotide metabolic process                                          | biological process | 4.644       | -3.011      | 3.420e-06   | 2.605e-03   |
| 0006950 | response to stress                                                    | biological process | 3.993       | -2.261      | 6.515e-05   | 2.374e-02   |
| 0008610 | lipid biosynthetic process                                            | biological process | 5.803       | -2.945      | 6.516e-09   | 3.227e-03   |
| 0009165 | nucleotide biosynthetic process                                       | biological process | 7.178       | -4.729      | 7.055e-13   | 2.258e-06   |
| 0016051 | carbohydrate biosynthetic process                                     | biological process | -1.369      | 2.282       | 1.709e-01   | 2.248e-02   |
| 0006350 | transcription                                                         | biological process | -5.102      | 10.378      | 3.361e-07   | 3.132e-25   |
| 0005737 | cytoplasm                                                             | cellular component | 14.022      | -3.282      | 1.149e-44   | 1.030e-03   |
| 0031224 | intrinsic to membrane                                                 | cellular component | -4.046      | 6.168       | 5.205e-05   | 6.936e-10   |
| 0005886 | plasma membrane                                                       | cellular component | -1.739      | 8.496       | 8.208e-02   | 1.955e-17   |
| 0003824 | catalytic activity                                                    | molecular function | 4.103       | 3.897       | 4.075e-05   | 9.719e-05   |
| 0016740 | transferase activity                                                  | molecular function | 13.767      | -2.951      | 4.006e-43   | 3.171e-03   |
| 0046872 | metal ion binding                                                     | molecular function | 14.184      | 1.372       | 1.144e-45   | 1.701e-01   |
| 0016491 | oxidoreductase activity                                               | molecular function | 14.735      | -1.949      | 3.822e-49   | 5.134e-02   |
| 0016787 | hydrolase activity                                                    | molecular function | 13.525      | -3.230      | 1.111e-41   | 1.240e-03   |
| 0017076 | purine nucleotide binding                                             | molecular function | 3.948       | -2.534      | 7.880e-05   | 1.128e-02   |
| 0005524 | ATP binding                                                           | molecular function | 9.937       | -1.442      | 2.870e-23   | 1.493e-01   |
| 0016829 | lyase activity                                                        | molecular function | 9.721       | -4.124      | 2.444e-22   | 3.727e-05   |
| 0046914 | transition metal ion binding                                          | molecular function | 5.792       | -3.792      | 6.969e-09   | 1.496e-04   |
| 0005515 | protein binding                                                       | molecular function | 5.478       | 2.312       | 4.300e-08   | 2.080e-02   |
| 0003676 | nucleic acid binding                                                  | molecular function | -4.128      | 6.288       | 3.665e-05   | 3.219e-10   |
| 0016301 | kinase activity                                                       | molecular function | 9.861       | -5.677      | 6.166e-23   | 1.368e-08   |
| 0016874 | ligase activity                                                       | molecular function | 1.979       | 4.592       | 4.783e-02   | 4.381e-06   |
| 0048037 | cofactor binding                                                      | molecular function | -4.729      | 7.178       | 2.258e-06   | 7.055e-13   |
| 0051536 | iron-sulfur cluster binding                                           | molecular function | 2.327       | 4.757       | 1.999e-02   | 1.962e-06   |
| 0003677 | DNA binding                                                           | molecular function | -5.679      | 11.857      | 1.356e-08   | 1.985e-32   |
| 0016614 | oxidoreductase activity, acting on CH-OH group of donors              | molecular function | -2.400      | 3.754       | 1.638e-02   | 1.738e-04   |
| 0050662 | coenzyme binding                                                      | molecular function | 4.216       | -1.667      | 2.481e-05   | 9.552e-02   |
| 0016853 | isomerase activity                                                    | molecular function | 5.154       | -1.549      | 2.549e-07   | 1.215e-01   |
| 0016757 | transferase activity, transferring glycosyl groups                    | molecular function | 6.695       | -2.998      | 2.158e-11   | 2.717e-03   |
| 0016779 | nucleotidyltransferase activity                                       | molecular function | -7.604      | 13.051      | 2.872e-14   | 6.298e-39   |
| 0005506 | iron ion binding                                                      | molecular function | 2.347       | 3.222       | 1.890e-02   | 1.272e-03   |
| 0070011 | peptidase activity, acting on L-amino acid peptides                   | molecular function | -2.661      | 4.133       | 7.794e-03   | 3.584e-05   |
| 0009055 | electron carrier activity                                             | molecular function | 4.797       | 3.389       | 1.611e-06   | 7.014e-04   |
| 0016810 | hydrolase activity, acting on carbon-nitrogen (but not peptide) bonds | molecular function | 2.282       | -1.369      | 2.248e-02   | 1.709e-01   |
| 0008168 | methyltransferase activity                                            | molecular function | 7.775       | -3.713      | 7.528e-15   | 2.046e-04   |

|         |                                                 |                    |       |        |           |           |
|---------|-------------------------------------------------|--------------------|-------|--------|-----------|-----------|
| 0016798 | hydrolase activity, acting on<br>glycosyl bonds | molecular function | 8.050 | -1.518 | 8.270e-16 | 1.290e-01 |
|---------|-------------------------------------------------|--------------------|-------|--------|-----------|-----------|

---

**Table S2.** Frequency of amino acids on the whole proteins, the contact residues and the hub contact residues

| Residues | Frequency in protein residues | Frequency in contact residues | Frequency in hub contact residues |
|----------|-------------------------------|-------------------------------|-----------------------------------|
| I        | 5.886                         | 4.133                         | 2.183                             |
| V        | 7.149                         | 4.565                         | 2.217                             |
| L        | 9.247                         | 6.279                         | 3.596                             |
| F        | 4.181                         | 4.905                         | 4.412                             |
| C        | 1.431                         | 2.986                         | 3.297                             |
| M        | 2.070                         | 2.078                         | 1.608                             |
| A        | 8.242                         | 5.416                         | 2.861                             |
| G        | 7.554                         | 9.225                         | 5.262                             |
| T        | 5.362                         | 5.580                         | 6.216                             |
| S        | 5.688                         | 6.162                         | 5.262                             |
| W        | 1.373                         | 2.349                         | 3.309                             |
| Y        | 3.506                         | 5.108                         | 6.491                             |
| P        | 4.639                         | 2.895                         | 1.321                             |
| H        | 2.517                         | 6.263                         | 13.373                            |
| N        | 4.157                         | 5.061                         | 5.641                             |
| Q        | 3.564                         | 2.965                         | 2.803                             |
| D        | 5.899                         | 6.620                         | 11.776                            |
| E        | 6.697                         | 5.221                         | 7.261                             |
| K        | 5.760                         | 5.007                         | 4.412                             |
| R        | 5.072                         | 7.186                         | 6.698                             |

**Table S3.** Scop domains significantly enriched in proteins with HETAIN, HETAI and HETAIN&HETAI. (*P*-value < 0.2)

| Scop domain | Name                                                        | HN_zscore | HI_zscore | HT&HI_zscore | HN_pvalue | HI_pvalue | HT&HI_pvalue |
|-------------|-------------------------------------------------------------|-----------|-----------|--------------|-----------|-----------|--------------|
| 46458       | Globin-like                                                 | 5.978     | -7.048    | -2.396       | 2.254E-09 | 1.810E-12 | 1.658E-02    |
| 48508       | Nuclear receptor ligand-binding domain                      | 5.604     | -4.463    | -3.456       | 2.093E-08 | 8.075E-06 | 5.473E-04    |
| 47616       | GST C-terminal domain-like                                  | 3.116     | -3.886    | -1.435       | 1.836E-03 | 1.020E-04 | 1.512E-01    |
| 46626       | Cytochrome c                                                | 4.015     | -4.513    | -1.670       | 5.938E-05 | 6.399E-06 | 9.491E-02    |
| 47473       | EF-hand                                                     | -4.078    | 4.944     | -2.995       | 4.552E-05 | 7.671E-07 | 2.744E-03    |
| 48726       | Immunoglobulin                                              | -1.830    | -3.607    | -7.338       | 6.725E-02 | 8.587E-03 | 8.587E-03    |
| 49899       | Concanavalin A-like lectins/glucanases                      | -5.185    | 2.924     | -4.448       | 2.160E-07 | 3.453E-03 | 8.674E-06    |
| 81296       | E set domains                                               | -3.019    | 1.339     | -2.086       | 2.532E-03 | 1.807E-01 | 3.701E-02    |
| 49503       | Cupredoxins                                                 | -4.189    | 3.370     | -1.669       | 2.801E-05 | 7.512E-04 | 9.505E-02    |
| 51011       | Glycosyl hydrolase domain                                   | -4.034    | 2.098     | -2.743       | 5.475E-05 | 3.592E-02 | 6.081E-03    |
| 50814       | Lipocalins                                                  | 3.466     | -4.236    | -1.435       | 5.289E-04 | 2.277E-05 | 1.512E-01    |
| 50129       | GroES-like                                                  | -2.362    | -2.762    | 3.243        | 1.818E-02 | 5.741E-03 | 1.184E-03    |
| 51735       | NAD(P)-binding Rossmann-fold domains                        | 3.689     | -7.865    | -1.879       | 2.250E-04 | 3.678E-15 | 6.020E-02    |
| 53383       | PLP-dependent transferases                                  | 4.514     | -5.245    | -2.562       | 6.376E-06 | 1.559E-07 | 1.041E-02    |
| 53335       | S-adenosyl-L-methionine-dependent methyltransferases        | -2.405    | -2.912    | -3.165       | 1.616E-02 | 3.596E-03 | 1.552E-03    |
| 52833       | Thioredoxin-like                                            | 2.472     | -2.528    | -2.806       | 1.343E-02 | 1.148E-02 | 5.023E-03    |
| 53067       | Actin-like ATPase domain                                    | -3.028    | -2.007    | 1.395        | 2.463E-03 | 4.473E-02 | 1.631E-01    |
| 51569       | Aldolase                                                    | -2.485    | 1.365     | -1.435       | 1.294E-02 | 1.722E-01 | 1.512E-01    |
| 53187       | Zn-dependent exopeptidases                                  | -3.653    | 3.418     | -1.689       | 2.588E-04 | 6.316E-04 | 9.118E-02    |
| 52518       | Thiamin diphosphate-binding fold (THDP-binding)             | -3.163    | -3.563    | 4.844        | 1.564E-03 | 3.668E-04 | 1.273E-06    |
| 51395       | FMN-linked oxidoreductases                                  | 4.384     | -3.703    | -2.426       | 1.165E-05 | 2.131E-04 | 1.526E-02    |
| 54452       | MHC antigen-recognition domain                              | -2.550    | -3.543    | -4.868       | 1.078E-02 | 3.954E-04 | 1.129E-06    |
| 56436       | C-type lectin-like                                          | -3.536    | 3.466     | -2.135       | 4.067E-04 | 5.289E-04 | 3.273E-02    |
| 56059       | Glutathione synthetase ATP-binding domain-like              | -1.575    | -1.575    | 1.405        | 1.153E-01 | 1.153E-01 | 1.601E-01    |
| 55424       | FAD/NAD-linked reductases, dimerisation (C-terminal) domain | 4.944     | -3.519    | -3.074       | 7.641E-07 | 4.333E-04 | 2.116E-03    |
